# Supplementary material for: microRNA-558 facilitates the expression of hypoxia-inducible factor 2 alpha through binding to 5′-untranslated region in neuroblastoma
Source: PubMed Central journal article supplement (PMC5130034; doi:10.18632/oncotarget.9813), 2016-06-03
Supplement: oncotarget-07-40657-s001.pdf [file oncotarget-07-40657-s001.pdf]

## SUPPLEMENTARY FIGURES AND TABLES

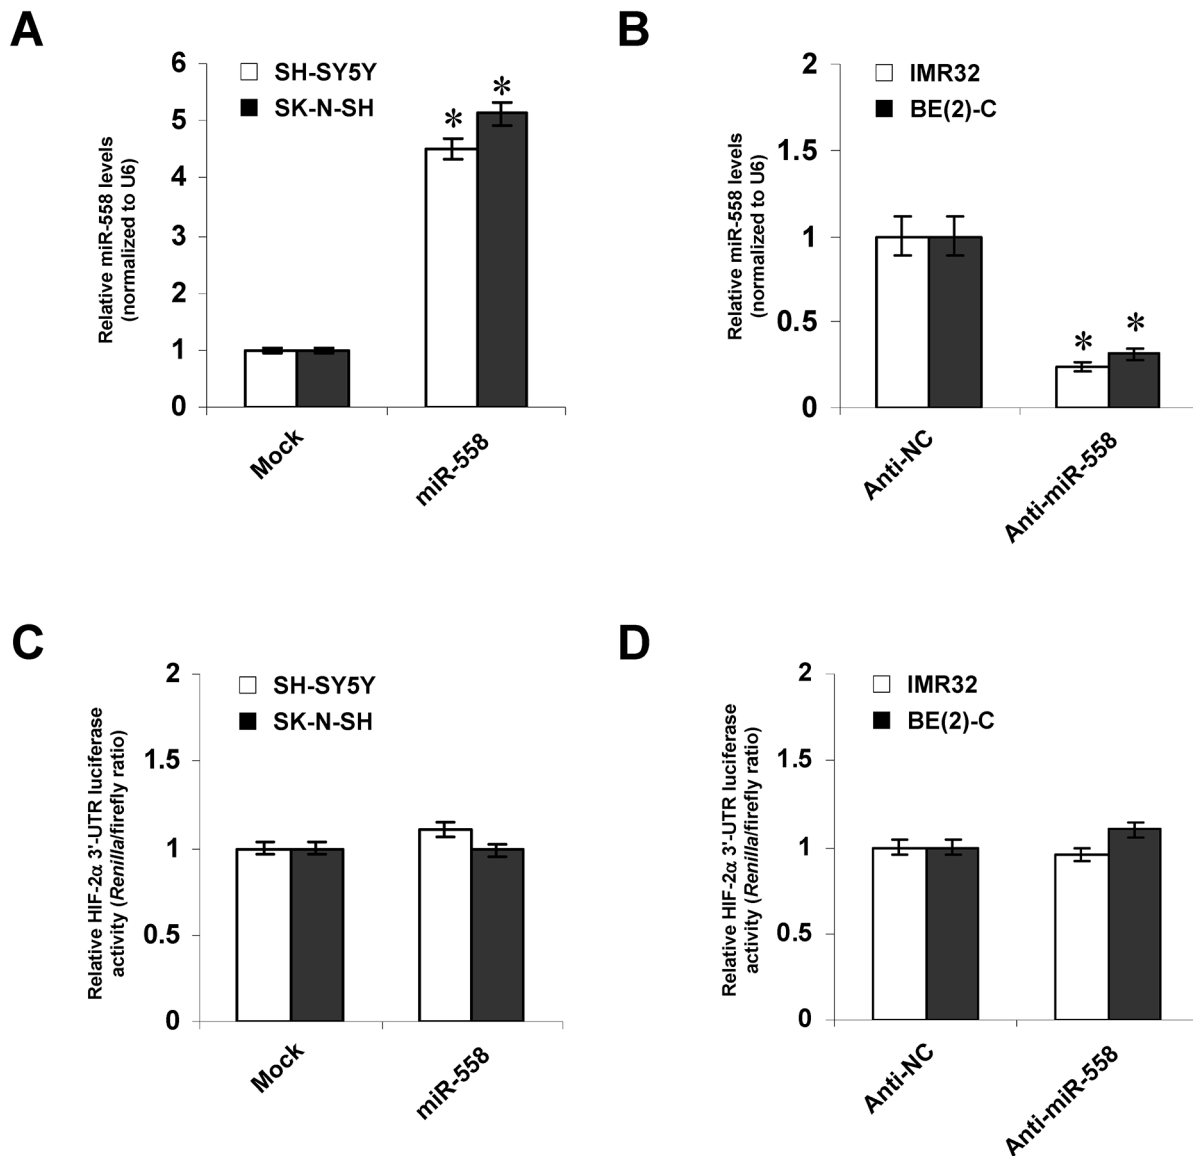

**Supplementary Figure S1: Effects of miR-558 on the 3'-UTR activity of *HIF-2α* in NB cells.** A. and B. real-time qRT-PCR showing the miR-558 levels in NB cells transfected with empty vector (mock), miR-558 precursor, anti-NC (100 nmol/L) or anti-miR-558 (100 nmol/L) inhibitors. C. and D. dual-luciferase assay indicating the activity of *HIF-2α* 3'-UTR luciferase reporter in NB cells transfected with mock, miR-558 precursor, anti-NC (100 nmol/L) or anti-miR-558 (100 nmol/L) inhibitors. \*  $P < 0.01$  vs. mock or anti-NC.

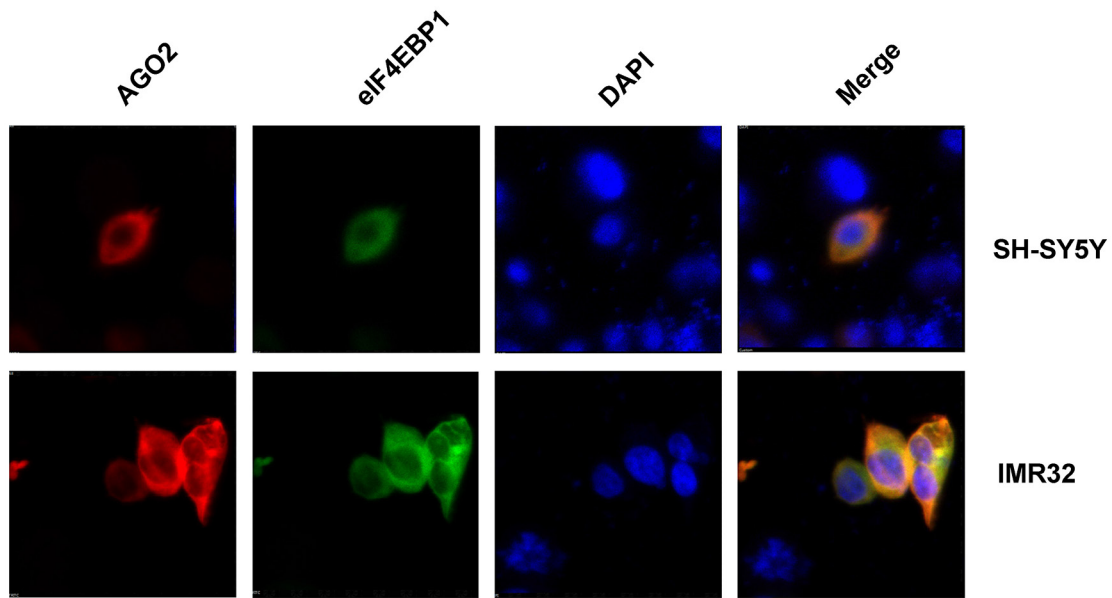

**Supplementary Figure S2: Endogenous expression of AGO2 and eIF4EBP1 in NB cells.** Immunofluorescence assay revealing the co-localization of AGO2 and eIF4EBP1 in cultured SH-SY5Y and IMR32 cells.

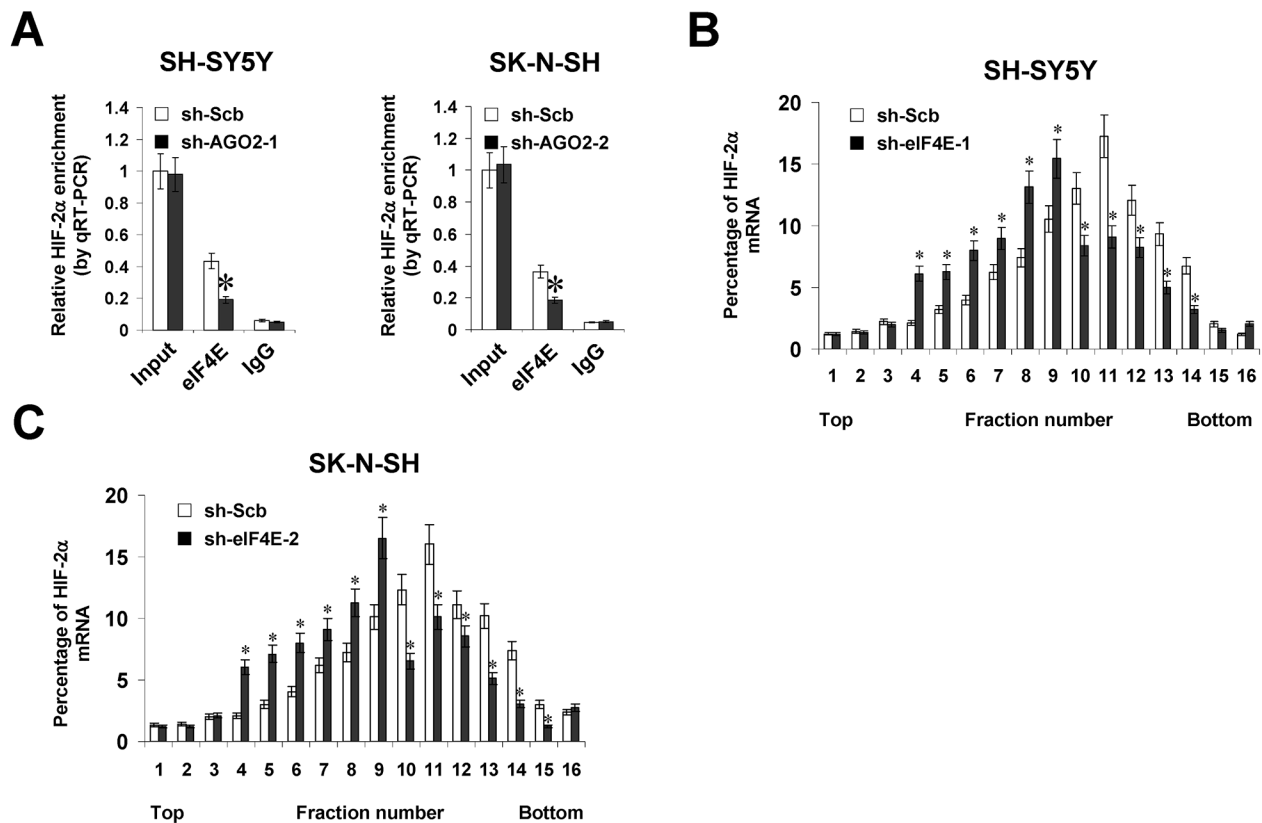

**Supplementary Figure S3: Effects of eIF4E on HIF-2 $\alpha$  translation in NB cells.** A. RIP and real-time qRT-PCR assay showing the binding of eIF4E to *HIF-2 $\alpha$*  5'-UTR in NB cells transfected with sh-Scb or sh-AGO2. B. and C. sucrose gradient sedimentation assay indicating the distribution of *HIF-2 $\alpha$*  transcripts to the polysome fractions in NB cells transfected with sh-Scb or sh-eIF4E. \*  $P < 0.01$  vs. sh-Scb.

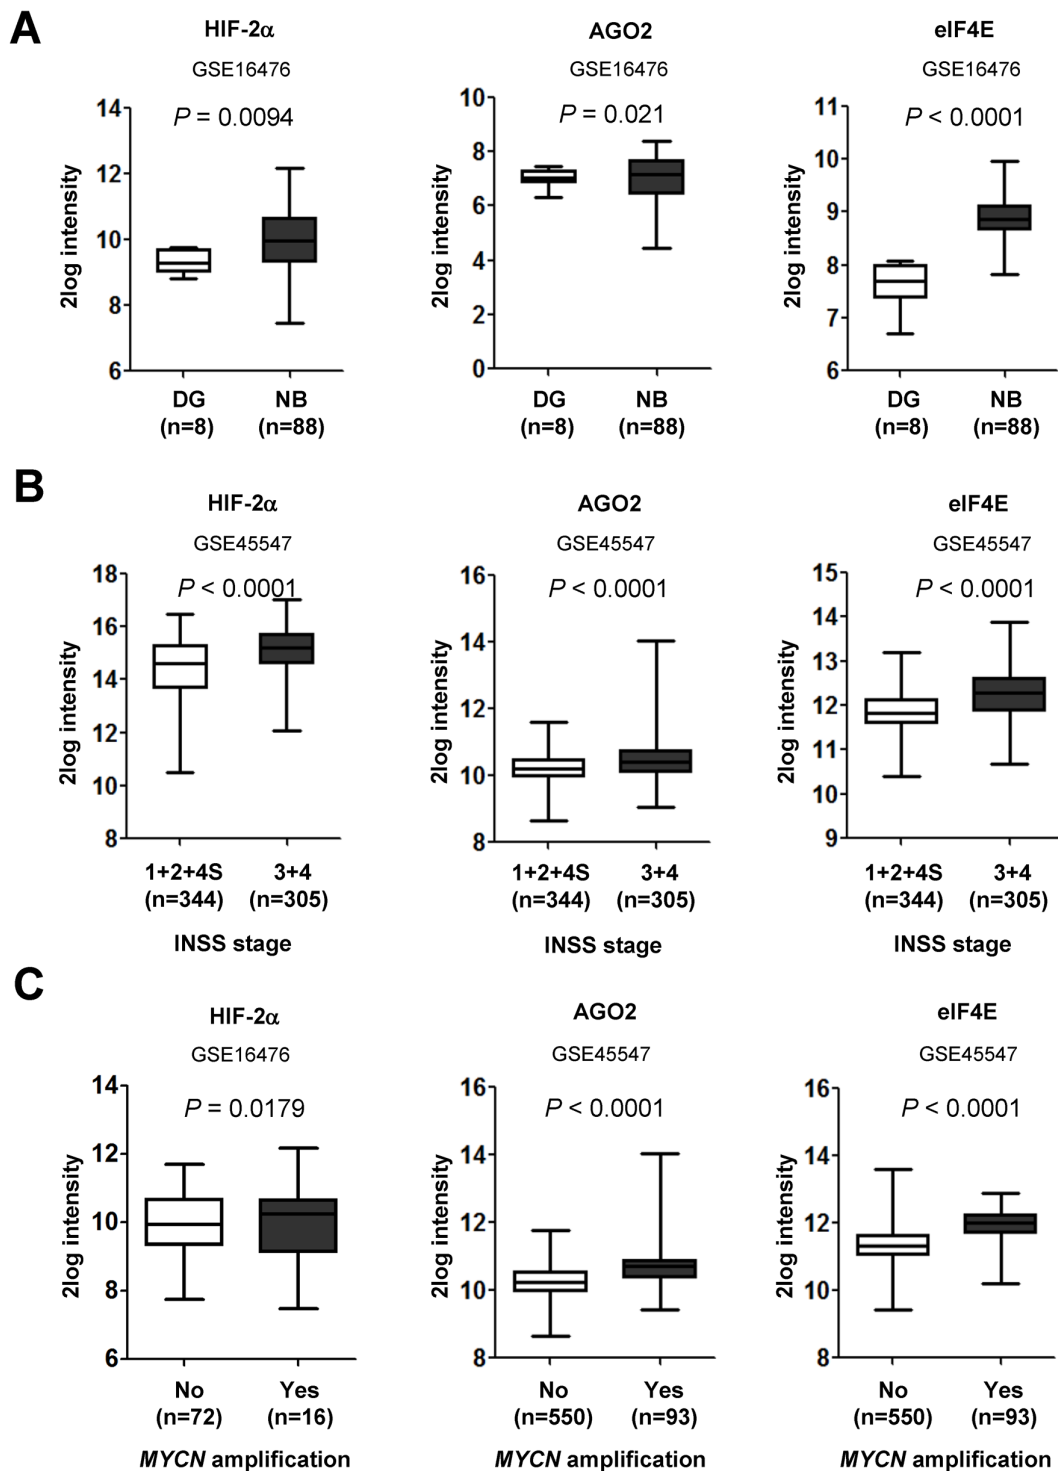

**Supplementary Figure S4: Expression of HIF-2α, AGO2, and eIF4E in public datasets.** A. the expression of HIF-2α, AGO2, and eIF4E in normal dorsal ganglia (DG) and NB tissues derived from GEO database and R2 microarray analysis and visualization platform (<http://r2.amc.nl>). B. and C. mining the GEO database and R2 microarray analysis and visualization platform (<http://r2.amc.nl>) showing the expression of HIF-2α, AGO2, and eIF4E in NB tissues with different INSS stages or MYCN amplification status.

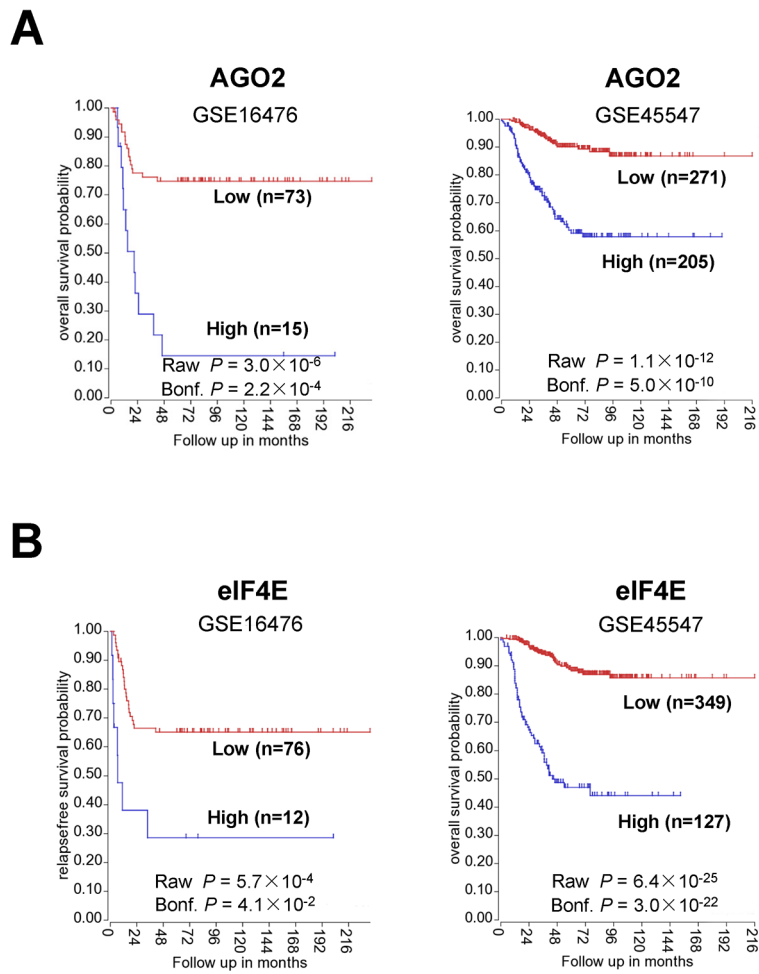

**Supplementary Figure S5: Patients' survival analysis.** Kaplan–Meier survival plots of NB cohorts (stratified by the scan method and adjusted by Bonferroni correction) derived from GEO database and R2 microarray analysis and visualization platform (<http://r2.amc.nl>) showing the survival probability of patients with high or low expression of AGO2 **A.** or eIF4E **B.**

Supplementary Table S1: Primer sets used for qRT-PCR and RIP

| Primer set            | Primers | Sequence                    | Product size (bp) | Application  |
|-----------------------|---------|-----------------------------|-------------------|--------------|
| HIF-2 $\alpha$        | Forward | 5'-AAAGCCTTGGAGGGTTTCATT-3' | 292               | qRT-PCR      |
|                       | Reverse | 5'-AGGTGGCTGACTTGAGGTTGA-3' |                   |              |
| HIF-2 $\alpha$ 5'-UTR | Forward | 5'-AGGCGGCCGTACAATCCT-3'    | 187               | qRT-PCR, RIP |
|                       | Reverse | 5'-TGTCAGACCCGAAAAGAG-3'    |                   |              |
| $\beta$ -actin        | Forward | 5'-ATCTACGAGGGGTATGCC-3'    | 227               | qRT-PCR      |
|                       | Reverse | 5'-TAGCTCTTCTCCAGGGAG-3'    |                   |              |
| miR-558               | Forward | RiboBio                     |                   | qRT-PCR      |
|                       | Reverse | RiboBio                     |                   |              |
| U6                    | Forward | RiboBio                     |                   | qRT-PCR      |
|                       | Reverse | RiboBio                     |                   |              |

HIF-2 $\alpha$ , hypoxia-inducible factor 2 alpha; 5'-UTR, 5'-untranslated region.

**Supplementary Table S2: Oligonucleotide sets used for constructs, inhibitors and short hairpin RNAs**

| Oligo set                           | Sequences                                                                                                                                                            |
|-------------------------------------|----------------------------------------------------------------------------------------------------------------------------------------------------------------------|
| pre-miR-558                         | 5'-TGCTGTGAGCTGCTGTACCAAAATGTTTGGCCACTGACTGACATTTGGTACAGCAGCTCA-3' (sense);<br>5'-CCTGTGAGCTGCTGTACCAAAATGTCAGTCAGTGGCCAAAACATTTGGTACAGCAGCTCAC-3' (antisense)       |
| pre-miR-NC                          | 5'-TGCTGAAATGTACTGCGCGTGGAGACGTTTTGGCCACTGACTGACGTCTCCACGCAGTACATTT-3' (sense);<br>5'-CCTGAAATGTACTGCGTGGAGACGTCAGTCAGTGGCCAAAACGTCTCCACGCAGTACATTTTC-3' (antisense) |
| HIF-2 $\alpha$ 5'-UTR mut (miR-558) | 5'-AGACTGTATGTTAGTACAGGCCCGCCCTCCGACTCCTTCCGACTCCCAGC-3' (sense);<br>5'-GGAGGCCGGCCTGTACTAACATACAGTCTCAGGACACTGCCGAGGATTG-3' (antisense)                             |
| Anti-NC                             | RiboBio                                                                                                                                                              |
| Anti-miR-558                        | RiboBio                                                                                                                                                              |
| sh-Scb                              | 5'-CCGGGCGAACGATCGAGTAAACGGACTCGAGTCCGTTTACTCGATCGTTCGCTTTTT-3' (sense);<br>5'-AATTCAAAAAGCGAACGATCGAGTAAACGGACTCGAGTCCGTTTACTCGATCGTTCGCG-3' (antisense)            |
| sh-AGO2-1                           | 5'-CCGGGCACAGCCAGTAATCGAGTTTCTCGAGAAACTCGATTACTGGCTGTGCTTTTTG-3' (sense);<br>5'-AATTCAAAAAGCACAGCCAGTAATCGAGTTTCTCGAGAAACTCGATTACTGGCTGTGC-3' (antisense)            |
| sh-AGO2-2                           | 5'-CCGGCGTCCGTGAATTTGGAATCATCTCGAGATGATTCCAAATTCACGGACGTTTTTG-3' (sense);<br>5'-AATTCAAAAACGTCCGTGAATTTGGAATCATCTCGAGATGATTCCAAATTCACGGACG-3' (antisense)            |
| sh-eIF4E-1                          | 5'-CCGGCAGAGAGGAGGAAGGAGAAGTCTCGAGACTTCTCCTCCTCTCTGTTTTTG-3' (sense);<br>5'-AATTCAAAAACAGAGAGGAGGAAGGAGAAGTCTCGAGACTTCTCCTCCTCTCTG-3' (antisense)                    |
| sh-eIF4E-2                          | 5'-CCGGCAGACCAGCAGATGGACAACCTCTCGAGAGTTGTCCATCTGCTGGTCTGTTTTG-3' (sense);<br>5'-AATTCAAAAACAGACCAGCAGATGGACAACCTCTCGAGAGTTGTCCATCTGCTGGTCTG-3' (antisense)           |
| sh-HIF-2 $\alpha$ -1                | 5'-CCGGGCGCAAATGTACCCAATGATACTCGAGTATCATTGGGTACATTTGCGCTTTTTG-3' (sense);<br>5'-AATTCAAAAAGCGCAAATGTACCCAATGATACTCGAGTATCATTGGGTACATTTGCGC-3' (antisense)            |
| sh-HIF-2 $\alpha$ -2                | 5'-CCGGCAGTACCCAGACGGATTTCAACTCGAGTTGAAATCCGTCTGGGTACTGTTTTTG-3' (sense);<br>5'-AATTCAAAAACAGTACCCAGACGGATTTCAACTCGAGTTGAAATCCGTCTGGGTACTG-3' (antisense)            |

pre-miR-NC, negative control miRNA precursor; HIF-2 $\alpha$ , hypoxia-inducible factor 2 alpha; 5'-UTR, 5'-untranslated region; Anti-NC, negative control inhibitor; sh-Scb, scramble short hairpin RNA; AGO2, Argonaute 2; eIF4E, eukaryotic translation initiation factor 4E.
